# Supplementary material
Source: PubMed Central journal article supplement (PMC3928209)
Supplement: supp_131358_canheart-tu-1-at.pdf [file supp_131358_canheart-tu-1-at.pdf]

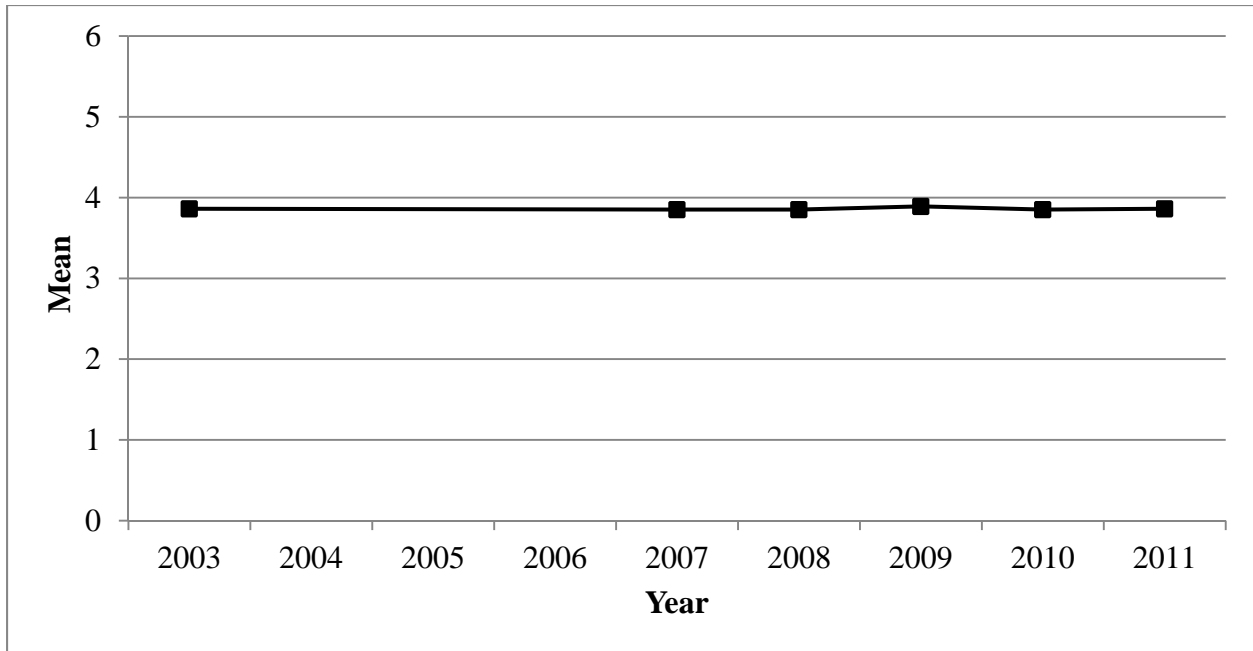

**Appendix 1 (as supplied by authors):** Mean CANHEART health index score among Canadian adults age 20 and older, Canadian Community Health Survey 2003-2011.
